# Supplementary material for: Unveiling the metabolic fate of monosaccharides in cell membranes with glycomic and glycoproteomic analyses
Source: Royal Society of Chemistry journal article supplement (doi:10.1039/c9sc01653h), 2019-01-01

## Supplementary Data

**Figure S1.** Incorporation of  $^{13}\text{C}$ -saccharides to cell membrane glycoproteins and identification of  $^{13}\text{C}$ -labeled glycans and glycopeptides.

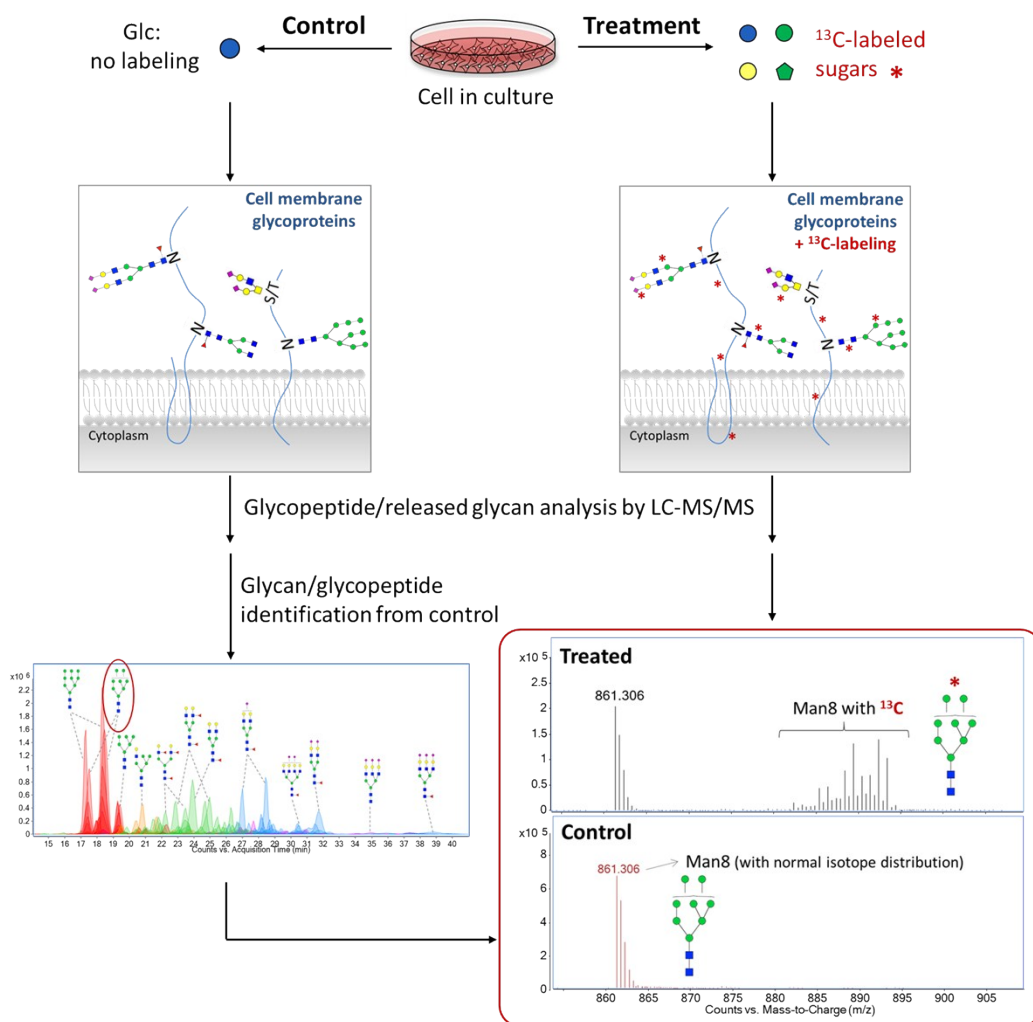

**Figure S2.** Different mechanisms for the incorporation of monosaccharides to glycoproteins.

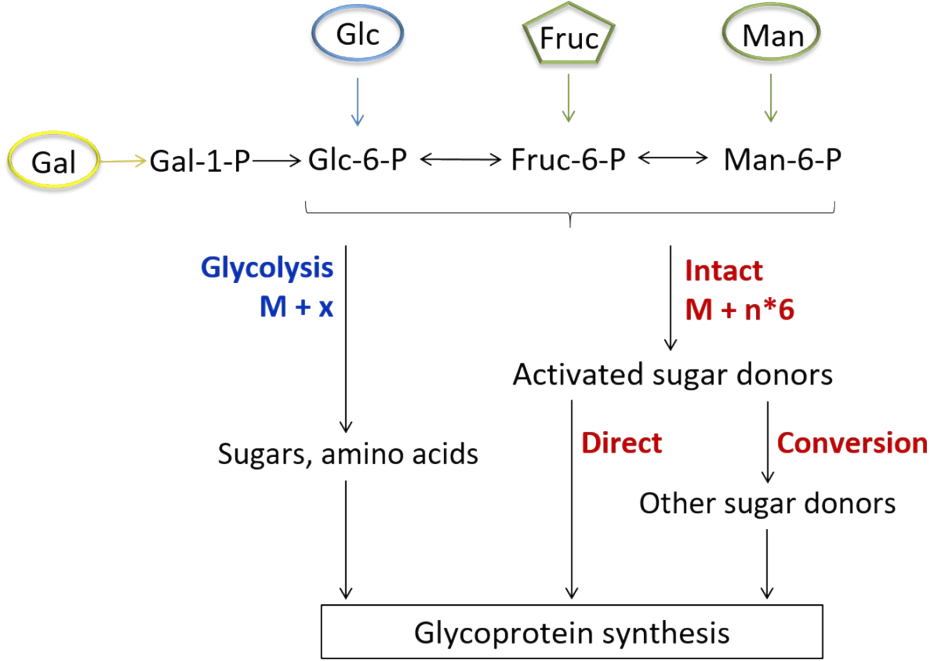

**Figure S3.** Incorporation of  $^{13}\text{C}$ -labeled glucose, mannose, galactose, and fructose into a fucosylated and sialylated complex-type N-glycan from Caco-2 and M213 cells.

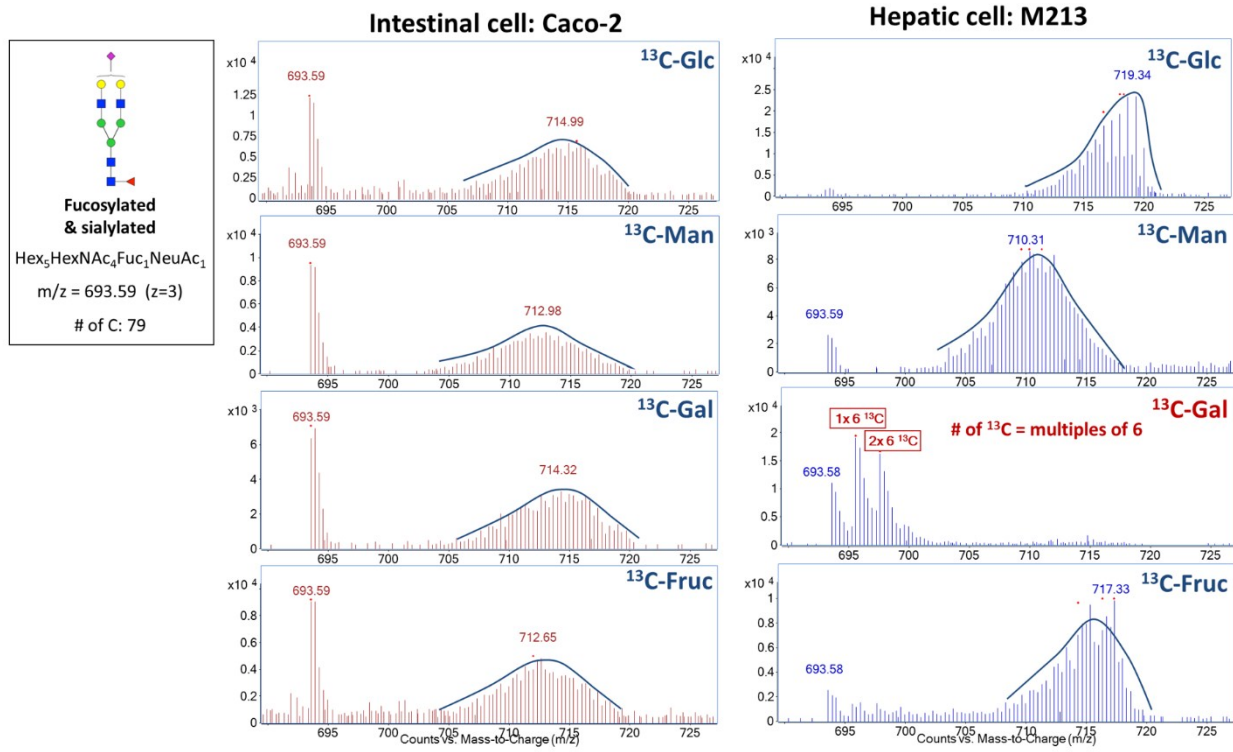

**Figure S4.** MS/MS spectra illustrating the incorporation and interconversion pathways of (a)  $^{13}\text{C}$ -labeled glucose in Caco-2 cells; (b)  $^{13}\text{C}$ -labeled mannose in M213 cells.

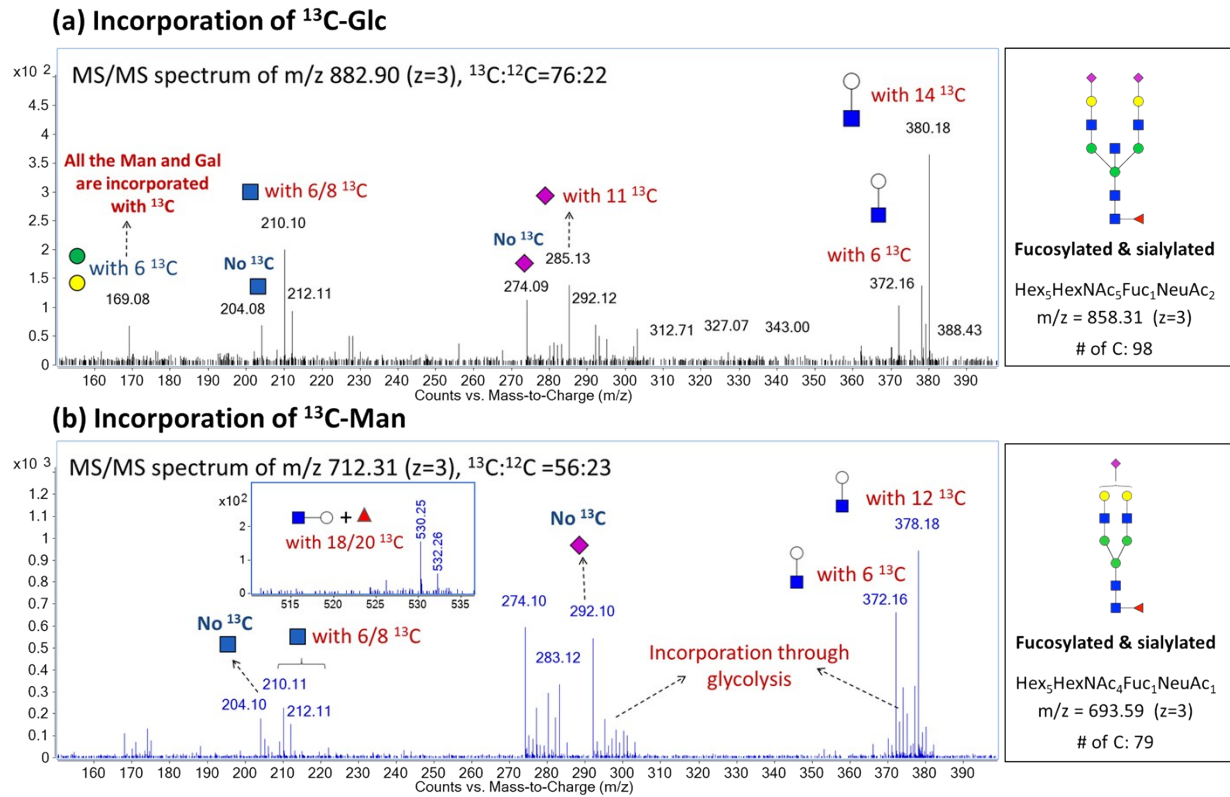

**Figure S5.** MS/MS spectra illustrating the differential incorporation pathways of  $^{13}\text{C}$ -labeled fructose in intestinal Caco-2 cell and hepatic M213 cell.

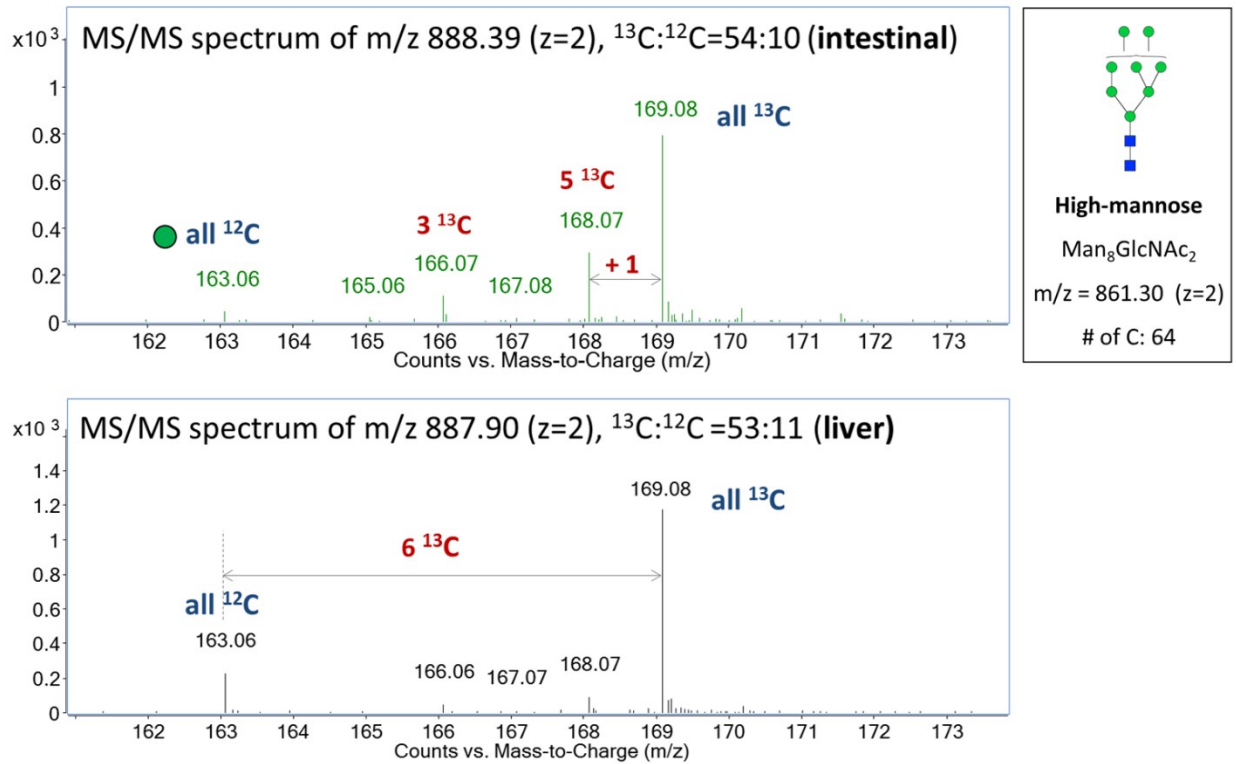

**Figure S6.** Decreased incorporation levels of  $^{13}\text{C}$ -fructose when glucose is present.

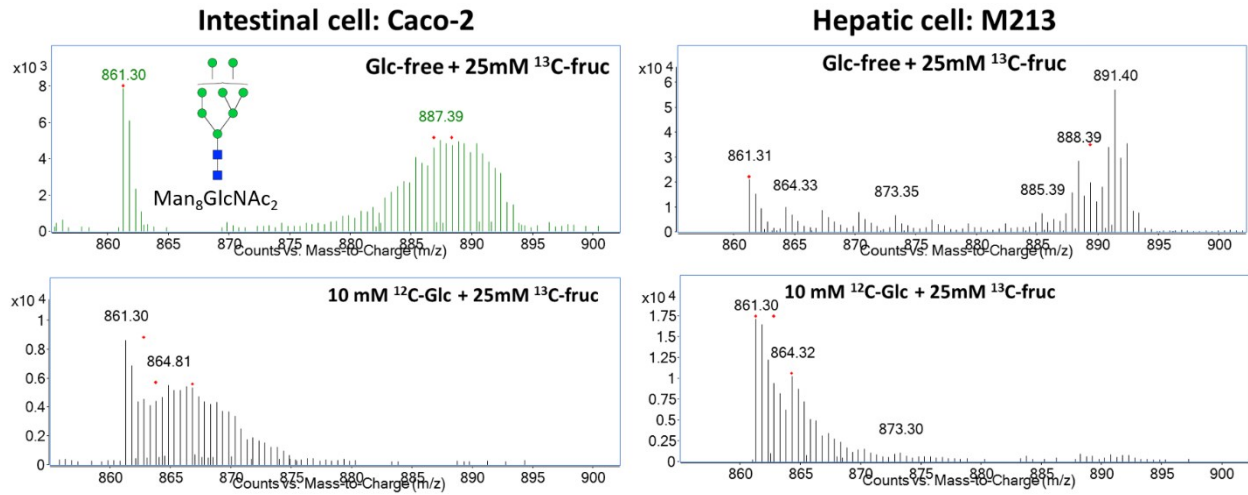

Supplement: c9sc01653h1.pdf [file c9sc01653h1.pdf]
